# Supplementary material for: Association between Coffee Consumption/Physical Exercise and Gastric, Hepatic, Colon, Breast, Uterine Cervix, Lung, Thyroid, Prostate, and Bladder Cancer
Source: MDPI journal article supplement (doi:10.3390/nu13113927), 2021-11-02
Supplement: s1 [file s1]

**Table S1.** General Characteristics of Participants

| Characteristics                         | Total participants  |                |                | P-value |
|-----------------------------------------|---------------------|----------------|----------------|---------|
|                                         | No regular exercise | < 150 min/week | ≥ 150 min/week |         |
| Number (n)                              | 82,095              | 23,667         | 56,458         |         |
| Age (mean, SD, y)                       | 52.9 (8.6)          | 52.1 (8.0)     | 54.1 (8.1)     | <0.001* |
| Sex (n, %)                              |                     |                |                | <0.001* |
| Male                                    | 25,953 (31.6)       | 9,081 (38.4)   | 20,576 (36.4)  |         |
| Female                                  | 56,142 (68.4)       | 14,586 (61.6)  | 35,882 (63.6)  |         |
| Obesity (BMI, kg/m <sup>2</sup> , n, %) |                     |                |                | <0.001* |
| Underweight (<18.5)                     | 1,845 (2.2)         | 368 (1.6)      | 693 (1.2)      |         |
| Normal (18.5-23)                        | 31,174 (38.0)       | 8,962 (37.9)   | 20,566 (36.4)  |         |
| Overweight (23-25)                      | 21,713 (26.4)       | 6,771 (28.6)   | 16,584 (29.4)  |         |
| Obese (≥ 25)                            | 27,363 (33.3)       | 7,566 (32.0)   | 18,615 (33.0)  |         |
| Income (n, %)                           |                     |                |                | <0.001* |
| Missing, no response                    | 11,315 (13.8)       | 2,758 (11.7)   | 6,619 (11.7)   |         |
| Lowest                                  | 25,933 (31.6)       | 5,701 (24.1)   | 14,347 (25.4)  |         |
| Middle                                  | 29,644 (36.1)       | 9,016 (38.1)   | 21,873 (38.7)  |         |
| Highest                                 | 15,203 (18.5)       | 6,192 (26.2)   | 13,619 (24.1)  |         |
| Smoking status (n, %)                   |                     |                |                | <0.001* |
| Nonsmoker                               | 60,619 (73.8)       | 16,910 (71.4)  | 40,784 (72.2)  |         |
| Past smoker                             | 9,841 (12.0)        | 3,756 (15.9)   | 10,191 (18.1)  |         |
| Current smoker                          | 11,635 (14.2)       | 3,001 (12.7)   | 5,483 (9.7)    |         |
| Alcohol consumption (n, %)              |                     |                |                | <0.001* |
| Non drinker                             | 43,942 (53.5)       | 11,005 (46.5)  | 27,680 (49.0)  |         |
| Past drinker                            | 2,980 (3.6)         | 990 (4.2)      | 2,282 (4.0)    |         |
| Current drinker                         | 35,173 (42.8)       | 11,672 (49.3)  | 26,496 (46.9)  |         |
| Hypertension (n, %)                     | 17,488 (21.3)       | 4,939 (20.9)   | 14,121 (25.0)  | <0.001* |
| Diabetes mellitus (n, %)                | 5,874 (7.2)         | 1,700 (7.2)    | 5,395 (7.9)    | <0.001* |
| Hyperlipidemia (n, %)                   | 9,868 (12.0)        | 3,306 (14.0)   | 8,512 (15.1)   | <0.001* |
| Stroke (n, %)                           | 1,132 (1.4)         | 269 (1.1)      | 878 (1.6)      | <0.001* |
| Ischemic heart disease (n, %)           | 2,426 (3.0)         | 627 (2.6)      | 1,897 (3.4)    | <0.001* |
| Nutritional intake (mean, SD)           |                     |                |                |         |
| Total calories (kcal/d)                 | 1731.4 (579.7)      | 1771.4 (579.4) | 1781.5 (584.3) | <0.001* |
| Protein (g/d)                           | 58.3 (26.5)         | 60.2 (26.8)    | 61.4 (27.1)    | <0.001* |
| Fat (g/d)                               | 27.5 (18.5)         | 28.4 (18.5)    | 28.7 (18.2)    | <0.001* |
| Carbohydrate (g/d)                      | 308.3 (94.6)        | 314.4 (94.9)   | 315.7 (96.2)   | <0.001* |
| Coffee consumption (n, %)               |                     |                |                | <0.001* |
| No drink                                | 13,541 (16.5)       | 3,698 (15.6)   | 9,892 (17.5)   |         |

|                         |               |              |               |         |
|-------------------------|---------------|--------------|---------------|---------|
| 1-30 cups/month         | 17,099 (20.8) | 6,079 (25.7) | 13,057 (23.1) |         |
| 30-60 cups/month        | 31,241 (38.1) | 8,948 (37.8) | 22,617 (40.1) |         |
| >60 cups/month          | 20,214 (24.6) | 4,942 (20.9) | 10,892 (19.3) |         |
| Gastric cancer          | 444 (0.5)     | 128 (0.5)    | 404 (0.7)     | <0.001* |
| Hepatic cancer          | 66 (0.1)      | 18 (0.1)     | 62 (0.1)      | 0.148   |
| Colon cancer            | 211 (0.3)     | 55 (0.2)     | 255 (0.5)     | <0.001* |
| Breast cancer †         | 475 (0.8)     | 155 (1.1)    | 487 (1.4)     | <0.001* |
| Uterine cervix cancer † | 355 (0.6)     | 94 (0.6)     | 240 (0.7)     | 0.796   |
| Lung cancer             | 83 (0.1)      | 24 (0.1)     | 79 (0.1)      | 0.089   |
| Thyroid cancer          | 616 (0.8)     | 191 (0.8)    | 603 (1.1)     | <0.001* |
| Prostate cancer †       | 53 (0.2)      | 24 (0.3)     | 90 (0.4)      | <0.001* |
| Bladder cancer          | 46 (0.1)      | 15 (0.1)     | 42 (0.1)      | 0.411   |

\* ANOVA or Chi-square test. Significance at  $P < 0.05$

† Breast and uterine cervix cancer was calculated in Female, and prostate cancer was in Male.

**Table S2.** Crude and adjusted odd ratios (95% confidence interval) of coffee drinking habit for gastric cancer histories

| Type of cancer     | OR (95% CI) for gastric cancer |         |                  |         |
|--------------------|--------------------------------|---------|------------------|---------|
|                    | Crude                          | P-value | Adjusted†        | P-value |
| Age < 53 years old |                                |         |                  |         |
| No drink           | 1.00                           |         | 1.00             |         |
| 1-30 cups/month    | 0.42 (0.29-0.60)               | <0.001* | 0.48 (0.33-0.69) | <0.001* |
| 30-60 cups/month   | 0.43 (0.31-0.58)               | <0.001* | 0.52 (0.38-0.72) | <0.001* |
| > 60 cups/month    | 0.36 (0.25-0.51)               | <0.001* | 0.45 (0.31-0.65) | <0.001* |
| Age ≥ 53 years old |                                |         |                  |         |
| No drink           | 1.00                           |         | 1.00             |         |
| 1-30 cups/month    | 0.74 (0.59-0.92)               | 0.008*  | 0.80 (0.64-1.01) | 0.058   |
| 30-60 cups/month   | 0.86 (0.71-1.05)               | 0.142   | 0.95 (0.78-1.17) | 0.640   |
| > 60 cups/month    | 0.98 (0.78-1.24)               | 0.893   | 0.98 (0.77-1.26) | 0.891   |
| Male               |                                |         |                  |         |
| No drink           | 1.00                           |         | 1.00             |         |
| 1-30 cups/month    | 0.59 (0.44-0.79)               | <0.001* | 0.76 (0.56-1.02) | 0.063   |
| 30-60 cups/month   | 0.79 (0.62-1.00)               | 0.053   | 1.06 (0.82-1.36) | 0.649   |
| > 60 cups/month    | 0.63 (0.49-0.82)               | <0.001* | 1.07 (0.81-1.41) | 0.631   |
| Female             |                                |         |                  |         |
| No drink           | 1.00                           |         | 1.00             |         |
| 1-30 cups/month    | 0.56 (0.44-0.73)               | <0.001* | 0.69 (0.53-0.89) | 0.005*  |
| 30-60 cups/month   | 0.49 (0.39-0.62)               | <0.001* | 0.65 (0.51-0.82) | <0.001* |
| > 60 cups/month    | 0.33 (0.23-0.46)               | <0.001* | 0.49 (0.34-0.71) | <0.001* |

\* Logistic regression model, Significance at  $P < 0.05$

† The model was adjusted for age, sex, income group, BMI, smoking, alcohol consumption, hypertension, diabetes mellitus, hyperlipidemia, stroke, ischemic heart disease histories, nutritional intake (total calories, protein, fat, and carbohydrate intake), and physical exercise.

**Table S3.** Crude and adjusted odd ratios (95% confidence interval) of coffee drinking habit for hepatic cancer histories

| Type of cancer     | OR (95% CI) for hepatic cancer |         |                  |         |
|--------------------|--------------------------------|---------|------------------|---------|
|                    | Crude                          | P-value | Adjusted†        | P-value |
| Age < 53 years old |                                |         |                  |         |
| No drink           | 1.00                           |         | 1.00             |         |
| 1-30 cups/month    | 0.44 (0.15-1.27)               | 0.128   | 0.49 (0.17-1.42) | 0.186   |
| 30-60 cups/month   | 0.52 (0.22-1.26)               | 0.148   | 0.61 (0.25-1.49) | 0.279   |
| > 60 cups/month    | 0.23 (0.07-0.76)               | 0.016*  | 0.19 (0.05-0.65) | 0.009*  |
| Age ≥ 53 years old |                                |         |                  |         |
| No drink           | 1.00                           |         | 1.00             |         |
| 1-30 cups/month    | 0.53 (0.30-0.91)               | 0.022*  | 0.55 (0.32-0.97) | 0.037*  |
| 30-60 cups/month   | 0.75 (0.48-1.16)               | 0.198   | 0.79 (0.50-1.24) | 0.301   |
| > 60 cups/month    | 0.50 (0.27-0.93)               | 0.028*  | 0.39 (0.20-0.75) | 0.005*  |
| Male               |                                |         |                  |         |
| No drink           | 1.00                           |         | 1.00             |         |
| 1-30 cups/month    | 0.49 (0.26-0.94)               | 0.032*  | 0.69 (0.36-1.34) | 0.279   |
| 30-60 cups/month   | 0.70 (0.41-1.18)               | 0.180   | 1.01 (0.59-1.74) | 0.975   |
| > 60 cups/month    | 0.33 (0.18-0.63)               | 0.001*  | 0.51 (0.26-1.01) | 0.053   |
| Female             |                                |         |                  |         |
| No drink           | 1.00                           |         | 1.00             |         |
| 1-30 cups/month    | 0.38 (0.18-0.80)               | 0.011*  | 0.43 (0.20-0.92) | 0.029*  |
| 30-60 cups/month   | 0.42 (0.23-0.79)               | 0.006*  | 0.52 (0.27-0.99) | 0.047*  |
| > 60 cups/month    | 0.05 (0.01-0.38)               | 0.004*  | 0.07 (0.01-0.51) | 0.009*  |

\* Logistic regression model, Significance at  $P < 0.05$

† The model was adjusted for age, sex, income group, BMI, smoking, alcohol consumption, hypertension, diabetes mellitus, hyperlipidemia, stoke, ischemic heart disease histories, nutritional intake (total calories, protein, fat, and carbohydrate intake), and physical exercise.

**Table S4.** Crude and adjusted odd ratios (95% confidence interval) of coffee drinking habit for colon cancer histories

| Type of cancer     | OR (95% CI) for colon cancer |         |                  |         |
|--------------------|------------------------------|---------|------------------|---------|
|                    | Crude                        | P-value | Adjusted†        | P-value |
| Age < 53 years old |                              |         |                  |         |
| No drink           | 1.00                         |         | 1.00             |         |
| 1-30 cups/month    | 0.71 (0.41-1.24)             | 0.231   | 0.80 (0.46-1.40) | 0.441   |
| 30-60 cups/month   | 0.64 (0.39-1.06)             | 0.083   | 0.78 (0.47-1.29) | 0.330   |
| > 60 cups/month    | 0.40 (0.22-0.72)             | 0.003*  | 0.47 (0.25-0.88) | 0.019*  |
| Age ≥ 53 years old |                              |         |                  |         |
| No drink           | 1.00                         |         | 1.00             |         |
| 1-30 cups/month    | 0.78 (0.59-1.03)             | 0.074   | 0.78 (0.59-1.03) | 0.081   |
| 30-60 cups/month   | 0.75 (0.58-0.96)             | 0.022*  | 0.73 (0.56-0.94) | 0.016*  |
| > 60 cups/month    | 0.63 (0.46-0.87)             | 0.005*  | 0.56 (0.40-0.79) | 0.001*  |
| Male               |                              |         |                  |         |
| No drink           | 1.00                         |         | 1.00             |         |
| 1-30 cups/month    | 0.82 (0.57-1.18)             | 0.290   | 0.95 (0.66-1.39) | 0.805   |
| 30-60 cups/month   | 0.73 (0.52-1.02)             | 0.064   | 0.84 (0.60-1.19) | 0.328   |
| > 60 cups/month    | 0.43 (0.29-0.63)             | <0.001* | 0.59 (0.40-0.89) | 0.012*  |
| Female             |                              |         |                  |         |
| No drink           | 1.00                         |         | 1.00             |         |
| 1-30 cups/month    | 0.56 (0.40-0.79)             | 0.001*  | 0.67 (0.47-0.95) | 0.025*  |
| 30-60 cups/month   | 0.53 (0.39-0.72)             | <0.001* | 0.69 (0.50-0.94) | 0.019*  |
| > 60 cups/month    | 0.31 (0.20-0.50)             | <0.001* | 0.52 (0.32-0.84) | 0.008*  |

\* Logistic regression model, Significance at  $P < 0.05$

† The model was adjusted for age, sex, income group, BMI, smoking, alcohol consumption, hypertension, diabetes mellitus, hyperlipidemia, stoke, ischemic heart disease histories, nutritional intake (total calories, protein, fat, and carbohydrate intake), and physical exercise.

**Table S5.** Crude and adjusted odd ratios (95% confidence interval) of coffee drinking habit for breast cancer histories

| Type of cancer     | OR (95% CI) for breast cancer |         |                       |         |
|--------------------|-------------------------------|---------|-----------------------|---------|
|                    | Crude                         | P-value | Adjusted <sup>†</sup> | P-value |
| Age < 53 years old |                               |         |                       |         |
| No drink           | 1.00                          |         | 1.00                  |         |
| 1-30 cups/month    | 0.63 (0.49-0.80)              | <0.001* | 0.73 (0.57-0.93)      | 0.011*  |
| 30-60 cups/month   | 0.46 (0.36-0.57)              | <0.001* | 0.56 (0.45-0.71)      | <0.001* |
| > 60 cups/month    | 0.34 (0.25-0.45)              | <0.001* | 0.45 (0.34-0.61)      | <0.001* |
| Age ≥ 53 years old |                               |         |                       |         |
| No drink           | 1.00                          |         | 1.00                  |         |
| 1-30 cups/month    | 0.75 (0.60-0.93)              | 0.011*  | 0.78 (0.62-0.98)      | 0.031*  |
| 30-60 cups/month   | 0.78 (0.64-0.95)              | 0.013*  | 0.86 (0.70-1.05)      | 0.135   |
| > 60 cups/month    | 0.55 (0.40-0.76)              | <0.001* | 0.67 (0.48-0.94)      | 0.019*  |
| Male               |                               |         |                       |         |
| No drink           | 1.00                          |         | 1.00                  |         |
| 1-30 cups/month    | N/A                           |         | N/A                   |         |
| 30-60 cups/month   | N/A                           |         | N/A                   |         |
| > 60 cups/month    | N/A                           |         | N/A                   |         |
| Female             |                               |         |                       |         |
| No drink           | 1.00                          |         | 1.00                  |         |
| 1-30 cups/month    | 0.70 (0.60-0.83)              | <0.001* | 0.78 (0.66-0.92)      | 0.003*  |
| 30-60 cups/month   | 0.61 (0.53-0.71)              | <0.001* | 0.72 (0.62-0.84)      | <0.001* |
| > 60 cups/month    | 0.43 (0.34-0.52)              | <0.001* | 0.56 (0.45-0.70)      | <0.001* |

\* Logistic regression model, Significance at  $P < 0.05$

<sup>†</sup> The model was adjusted for age, sex, income group, BMI, smoking, alcohol consumption, hypertension, diabetes mellitus, hyperlipidemia, stoke, ischemic heart disease histories, nutritional intake (total calories, protein, fat, and carbohydrate intake), and physical exercise.

**Table S6.** Crude and adjusted odd ratios (95% confidence interval) of coffee drinking habit for uterine cervix cancer histories

| Type of cancer     | OR (95% CI) for uterine cervix cancer |         |                  |         |
|--------------------|---------------------------------------|---------|------------------|---------|
|                    | Crude                                 | P-value | Adjusted†        | P-value |
| Age < 53 years old |                                       |         |                  |         |
| No drink           | 1.00                                  |         | 1.00             |         |
| 1-30 cups/month    | 1.06 (0.72-1.57)                      | 0.767   | 1.12 (0.75-1.66) | 0.586   |
| 30-60 cups/month   | 0.82 (0.57-1.19)                      | 0.290   | 0.90 (0.61-1.31) | 0.565   |
| > 60 cups/month    | 1.01 (0.68-1.50)                      | 0.950   | 1.14 (0.76-1.72) | 0.520   |
| Age ≥ 53 years old |                                       |         |                  |         |
| No drink           | 1.00                                  |         | 1.00             |         |
| 1-30 cups/month    | 0.83 (0.63-1.08)                      | 0.168   | 0.86 (0.65-1.13) | 0.278   |
| 30-60 cups/month   | 0.89 (0.70-1.13)                      | 0.321   | 0.93 (0.72-1.19) | 0.543   |
| > 60 cups/month    | 0.80 (0.57-1.14)                      | 0.215   | 0.85 (0.59-1.23) | 0.390   |
| Male               |                                       |         |                  |         |
| No drink           | 1.00                                  |         | 1.00             |         |
| 1-30 cups/month    | N/A                                   |         | N/A              |         |
| 30-60 cups/month   | N/A                                   |         | N/A              |         |
| > 60 cups/month    | N/A                                   |         | N/A              |         |
| Female             |                                       |         |                  |         |
| No drink           | 1.00                                  |         | 1.00             |         |
| 1-30 cups/month    | 0.86 (0.69-1.07)                      | 0.168   | 0.94 (0.75-1.18) | 0.609   |
| 30-60 cups/month   | 0.79 (0.65-0.96)                      | 0.020*  | 0.90 (0.73-1.11) | 0.335   |
| > 60 cups/month    | 0.78 (0.61-1.00)                      | 0.050   | 0.98 (0.75-1.27) | 0.868   |

\* Logistic regression model, Significance at  $P < 0.05$

† The model was adjusted for age, sex, income group, BMI, smoking, alcohol consumption, hypertension, diabetes mellitus, hyperlipidemia, stoke, ischemic heart disease histories, nutritional intake (total calories, protein, fat, and carbohydrate intake), and physical exercise.

**Table S7.** Crude and adjusted odd ratios (95% confidence interval) of coffee drinking habit for lung cancer histories

| Type of cancer     | OR (95% CI) for lung cancer |         |                  |         |
|--------------------|-----------------------------|---------|------------------|---------|
|                    | Crude                       | P-value | Adjusted†        | P-value |
| Age < 53 years old |                             |         |                  |         |
| No drink           | 1.00                        |         | 1.00             |         |
| 1-30 cups/month    | 0.22 (0.06-0.83)            | 0.025*  | 0.23 (0.06-0.86) | 0.029*  |
| 30-60 cups/month   | 0.28 (0.10-0.78)            | 0.014*  | 0.30 (0.11-0.84) | 0.022*  |
| > 60 cups/month    | 0.34 (0.12-0.99)            | 0.048*  | 0.36 (0.12-1.11) | 0.074   |
| Age ≥ 53 years old |                             |         |                  |         |
| No drink           | 1.00                        |         | 1.00             |         |
| 1-30 cups/month    | 0.85 (0.54-1.33)            | 0.471   | 0.88 (0.55-1.38) | 0.567   |
| 30-60 cups/month   | 0.74 (0.49-1.11)            | 0.145   | 0.74 (0.48-1.13) | 0.158   |
| > 60 cups/month    | 1.02 (0.64-1.63)            | 0.923   | 0.92 (0.56-1.52) | 0.745   |
| Male               |                             |         |                  |         |
| No drink           | 1.00                        |         | 1.00             |         |
| 1-30 cups/month    | 0.82 (0.44-1.53)            | 0.536   | 1.02 (0.54-1.91) | 0.953   |
| 30-60 cups/month   | 0.66 (0.37-1.16)            | 0.149   | 0.80 (0.44-1.44) | 0.453   |
| > 60 cups/month    | 0.68 (0.38-1.23)            | 0.204   | 1.08 (0.58-2.01) | 0.814   |
| Female             |                             |         |                  |         |
| No drink           | 1.00                        |         | 1.00             |         |
| 1-30 cups/month    | 0.47 (0.26-0.85)            | 0.012   | 0.56 (0.31-1.03) | 0.063   |
| 30-60 cups/month   | 0.43 (0.26-0.73)            | 0.002*  | 0.56 (0.32-0.96) | 0.034*  |
| > 60 cups/month    | 0.33 (0.16-0.70)            | 0.004*  | 0.55 (0.25-1.21) | 0.136   |

\* Logistic regression model, Significance at  $P < 0.05$

† The model was adjusted for age, sex, income group, BMI, smoking, alcohol consumption, hypertension, diabetes mellitus, hyperlipidemia, stoke, ischemic heart disease histories, nutritional intake (total calories, protein, fat, and carbohydrate intake), and physical exercise.



**Table S8.** Crude and adjusted odd ratios (95% confidence interval) of coffee drinking habit for thyroid cancer histories

| Type of cancer     | OR (95% CI) for thyroid cancer |         |                  |         |
|--------------------|--------------------------------|---------|------------------|---------|
|                    | Crude                          | P-value | Adjusted†        | P-value |
| Age < 53 years old |                                |         |                  |         |
| No drink           | 1.00                           |         | 1.00             |         |
| 1-30 cups/month    | 0.91 (0.73-1.14)               | 0.419   | 0.95 (0.76-1.19) | 0.667   |
| 30-60 cups/month   | 0.72 (0.58-0.89)               | 0.002*  | 0.75 (0.60-0.93) | 0.009*  |
| > 60 cups/month    | 0.51 (0.40-0.64)               | <0.001* | 0.68 (0.53-0.87) | 0.002*  |
| Age ≥ 53 years old |                                |         |                  |         |
| No drink           | 1.00                           |         | 1.00             |         |
| 1-30 cups/month    | 0.85 (0.69-1.05)               | 0.185   | 0.87 (0.70-1.08) | 0.201   |
| 30-60 cups/month   | 0.76 (0.62-0.92)               | 0.005*  | 0.80 (0.65-0.98) | 0.029*  |
| > 60 cups/month    | 0.54 (0.42-0.71)               | <0.001* | 0.76 (0.57-1.00) | 0.054   |
| Male               |                                |         |                  |         |
| No drink           | 1.00                           |         | 1.00             |         |
| 1-30 cups/month    | 0.73 (0.42-1.28)               | 0.267   | 0.78 (0.44-1.38) | 0.400   |
| 30-60 cups/month   | 0.64 (0.38-1.06)               | 0.083   | 0.70 (0.41-1.18) | 0.176   |
| > 60 cups/month    | 0.55 (0.32-0.95)               | 0.032*  | 0.74 (0.42-1.31) | 0.302   |
| Female             |                                |         |                  |         |
| No drink           | 1.00                           |         | 1.00             |         |
| 1-30 cups/month    | 0.96 (0.82-1.13)               | 0.645   | 0.93 (0.79-1.10) | 0.395   |
| 30-60 cups/month   | 0.81 (0.70-0.94)               | 0.007*  | 0.78 (0.67-0.91) | 0.001*  |
| > 60 cups/month    | 0.72 (0.60-0.87)               | 0.001*  | 0.70 (0.57-0.85) | <0.001* |

\* Logistic regression model, Significance at  $P < 0.05$

† The model was adjusted for age, sex, income group, BMI, smoking, alcohol consumption, hypertension, diabetes mellitus, hyperlipidemia, stroke, ischemic heart disease histories, nutritional intake (total calories, protein, fat, and carbohydrate intake), and physical exercise.

**Table S9.** Crude and adjusted odd ratios (95% confidence interval) of coffee drinking habit for prostate cancer histories

| Type of cancer     | OR (95% CI) for prostate cancer |         |                       |         |
|--------------------|---------------------------------|---------|-----------------------|---------|
|                    | Crude                           | P-value | Adjusted <sup>†</sup> | P-value |
| Age < 53 years old |                                 |         |                       |         |
| No drink           | 1.00                            |         | 1.00                  |         |
| 1-30 cups/month    | N/A                             |         | N/A                   |         |
| 30-60 cups/month   | N/A                             |         | N/A                   |         |
| > 60 cups/month    | N/A                             |         | N/A                   |         |
| Age ≥ 53 years old |                                 |         |                       |         |
| No drink           | 1.00                            |         | 1.00                  |         |
| 1-30 cups/month    | 0.88 (0.55-1.42)                | 0.604   | 0.96 (0.59-1.56)      | 0.870   |
| 30-60 cups/month   | 0.79 (0.51-1.22)                | 0.278   | 0.86 (0.55-1.35)      | 0.519   |
| > 60 cups/month    | 0.62 (0.38-1.02)                | 0.058   | 0.83 (0.49-1.39)      | 0.477   |
| Male               |                                 |         |                       |         |
| No drink           | 1.00                            |         | 1.00                  |         |
| 1-30 cups/month    | 0.84 (0.52-1.35)                | 0.464   | 0.98 (0.61-1.60)      | 0.946   |
| 30-60 cups/month   | 0.74 (0.48-1.14)                | 0.173   | 0.87 (0.55-1.36)      | 0.528   |
| > 60 cups/month    | 0.49 (0.30-0.80)                | 0.004*  | 0.86 (0.52-1.44)      | 0.578   |
| Female             |                                 |         |                       |         |
| No drink           | 1.00                            |         | 1.00                  |         |
| 1-30 cups/month    | N/A                             |         | N/A                   |         |
| 30-60 cups/month   | N/A                             |         | N/A                   |         |
| > 60 cups/month    | N/A                             |         | N/A                   |         |

\* Logistic regression model, Significance at  $P < 0.05$

<sup>†</sup> The model was adjusted for age, sex, income group, BMI, smoking, alcohol consumption, hypertension, diabetes mellitus, hyperlipidemia, stroke, ischemic heart disease histories, nutritional intake (total calories, protein, fat, and carbohydrate intake), and physical exercise.

**Table S10.** Crude and adjusted odd ratios (95% confidence interval) of coffee drinking habit for bladder cancer histories

| Type of cancer     | OR (95% CI) for bladder cancer |         |                       |         |
|--------------------|--------------------------------|---------|-----------------------|---------|
|                    | Crude                          | P-value | Adjusted <sup>†</sup> | P-value |
| Age < 53 years old |                                |         |                       |         |
| No drink           | 1.00                           |         | 1.00                  |         |
| 1-30 cups/month    | N/A                            |         | N/A                   |         |
| 30-60 cups/month   | N/A                            |         | N/A                   |         |
| > 60 cups/month    | N/A                            |         | N/A                   |         |
| Age ≥ 53 years old |                                |         |                       |         |
| No drink           | 1.00                           |         | 1.00                  |         |
| 1-30 cups/month    | 0.52 (0.25-1.09)               | 0.082   | 0.51 (0.24-1.09)      | 0.082   |
| 30-60 cups/month   | 0.91 (0.52-1.61)               | 0.750   | 0.86 (0.48-1.55)      | 0.617   |
| > 60 cups/month    | 1.34 (0.72-2.49)               | 0.360   | 0.98 (0.50-1.92)      | 0.952   |
| Male               |                                |         |                       |         |
| No drink           | 1.00                           |         | 1.00                  |         |
| 1-30 cups/month    | 0.76 (0.34-1.70)               | 0.505   | 0.89 (0.39-1.99)      | 0.770   |
| 30-60 cups/month   | 0.91 (0.45-1.83)               | 0.791   | 1.03 (0.51-2.10)      | 0.934   |
| > 60 cups/month    | 0.86 (0.42-1.76)               | 0.679   | 1.15 (0.54-2.45)      | 0.726   |
| Female             |                                |         |                       |         |
| No drink           | 1.00                           |         | 1.00                  |         |
| 1-30 cups/month    | 0.60 (0.21-1.72)               | 0.338   | 0.84 (0.29-2.45)      | 0.752   |
| 30-60 cups/month   | 0.64 (0.26-1.60)               | 0.340   | 1.09 (0.42-2.81)      | 0.859   |
| > 60 cups/month    | 0.40 (0.11-1.51)               | 0.178   | 0.84 (0.21-3.41)      | 0.809   |

\* Logistic regression model, Significance at  $P < 0.05$

<sup>†</sup> The model was adjusted for age, sex, income group, BMI, smoking, alcohol consumption, hypertension, diabetes mellitus, hyperlipidemia, stroke, ischemic heart disease histories, nutritional intake (total calories, protein, fat, and carbohydrate intake), and physical exercise.

**Table S11.** Crude and adjusted odd ratios (95% confidence interval) of physical exercise for gastric cancer histories

| Type of cancer      | OR (95% CI) for gastric cancer |         |                  |         |
|---------------------|--------------------------------|---------|------------------|---------|
|                     | Crude                          | P-value | Adjusted†        | P-value |
| Age < 53 years old  |                                |         |                  |         |
| No regular exercise | 1.00                           |         | 1.00             |         |
| < 150 min/week      | 0.99 (0.69-1.41)               | 0.945   | 0.94 (0.65-1.35) | 0.741   |
| ≥ 150 min/week      | 1.32 (1.02-1.72)               | 0.036*  | 1.23 (0.94-1.61) | 0.125   |
| Age ≥ 53 years old  |                                |         |                  |         |
| No regular exercise | 1.00                           |         | 1.00             |         |
| < 150 min/week      | 1.06 (0.84-1.34)               | 0.624   | 1.06 (0.84-1.35) | 0.611   |
| ≥ 150 min/week      | 1.24 (1.06-1.45)               | 0.008*  | 1.15 (0.98-1.35) | 0.092   |
| Male                |                                |         |                  |         |
| No drink            | 1.00                           |         | 1.00             |         |
| No regular exercise | 0.96 (0.74-1.25)               | 0.762   | 1.13 (0.87-1.47) | 0.376   |
| < 150 min/week      | 1.31 (1.10-1.58)               | 0.003*  | 1.19 (0.99-1.44) | 0.066   |
| Female              |                                |         |                  |         |
| No regular exercise | 1.00                           |         | 1.00             |         |
| < 150 min/week      | 0.91 (0.67-1.24)               | 0.559   | 0.92 (0.67-1.25) | 0.578   |
| ≥ 150 min/week      | 1.21 (0.99-1.48)               | 0.067   | 1.18 (0.96-1.45) | 0.115   |

\* Logistic regression model, Significance at  $P < 0.05$

† The model was adjusted for age, sex, income group, BMI, smoking, alcohol consumption, hypertension, diabetes mellitus, hyperlipidemia, stoke, ischemic heart disease histories, nutritional intake (total calories, protein, fat, and carbohydrate intake), and coffee consumption.

**Table S12.** Crude and adjusted odd ratios (95% confidence interval) of physical exercise for hepatic cancer histories

| Type of cancer      | OR (95% CI) for hepatic cancer |         |                  |         |
|---------------------|--------------------------------|---------|------------------|---------|
|                     | Crude                          | P-value | Adjusted†        | P-value |
| Age < 53 years old  |                                |         |                  |         |
| No regular exercise | 1.00                           |         | 1.00             |         |
| < 150 min/week      | 0.46 (0.10-2.02)               | 0.304   | 0.42 (0.10-1.88) | 0.260   |
| ≥ 150 min/week      | 1.76 (0.85-3.65)               | 0.128   | 1.67 (0.79-3.51) | 0.178   |
| Age ≥ 53 years old  |                                |         |                  |         |
| No regular exercise | 1.00                           |         | 1.00             |         |
| < 150 min/week      | 1.16 (0.66-2.04)               | 0.599   | 1.16 (0.66-2.05) | 0.607   |
| ≥ 150 min/week      | 1.17 (0.79-1.74)               | 0.426   | 1.06 (0.71-1.59) | 0.777   |
| Male                |                                |         |                  |         |
| No regular exercise | 1.00                           |         | 1.00             |         |
| < 150 min/week      | 0.54 (0.26-1.16)               | 0.115   | 0.63 (0.29-1.35) | 0.231   |
| ≥ 150 min/week      | 1.35 (0.89-2.06)               | 0.160   | 1.22 (0.79-1.89) | 0.359   |
| Female              |                                |         |                  |         |
| No regular exercise | 1.00                           |         | 1.00             |         |
| < 150 min/week      | 1.60 (0.77-3.36)               | 0.209   | 1.70 (0.81-3.58) | 0.162   |
| ≥ 150 min/week      | 1.11 (0.60-2.06)               | 0.746   | 1.09 (0.58-2.05) | 0.782   |

\* Logistic regression model, Significance at  $P < 0.05$

† The model was adjusted for age, sex, income group, BMI, smoking, alcohol consumption, hypertension, diabetes mellitus, hyperlipidemia, stoke, ischemic heart disease histories, nutritional intake (total calories, protein, fat, and carbohydrate intake), and coffee consumption.

**Table S13.** Crude and adjusted odd ratios (95% confidence interval) of physical exercise for colon cancer histories

| Type of cancer      | OR (95% CI) for colon cancer |         |                  |         |
|---------------------|------------------------------|---------|------------------|---------|
|                     | Crude                        | P-value | Adjusted†        | P-value |
| Age < 53 years old  |                              |         |                  |         |
| No regular exercise | 1.00                         |         | 1.00             |         |
| < 150 min/week      | 0.70 (0.38-1.31)             | 0.266   | 0.66 (0.35-1.24) | 0.197   |
| ≥ 150 min/week      | 1.50 (1.02-2.19)             | 0.040*  | 1.42 (0.96-2.10) | 0.080   |
| Age ≥ 53 years old  |                              |         |                  |         |
| No regular exercise | 1.00                         |         | 1.00             |         |
| < 150 min/week      | 1.04 (0.74-1.46)             | 0.815   | 1.03 (0.73-1.44) | 0.885   |
| ≥ 150 min/week      | 1.71 (1.39-2.11)             | <0.001* | 1.55 (1.25-1.92) | <0.001* |
| Male                |                              |         |                  |         |
| No regular exercise | 1.00                         |         | 1.00             |         |
| < 150 min/week      | 0.75 (0.50-1.14)             | 0.185   | 0.84 (0.55-1.28) | 0.411   |
| ≥ 150 min/week      | 1.66 (1.29-2.14)             | <0.001* | 1.39 (1.07-1.81) | 0.013*  |
| Female              |                              |         |                  |         |
| No regular exercise | 1.00                         |         | 1.00             |         |
| < 150 min/week      | 0.99 (0.65-1.51)             | 0.962   | 1.01 (0.66-1.54) | 0.966   |
| ≥ 150 min/week      | 1.73 (1.33-2.25)             | <0.001* | 1.65 (1.26-2.15) | <0.001* |

\* Logistic regression model, Significance at  $P < 0.05$

† The model was adjusted for age, sex, income group, BMI, smoking, alcohol consumption, hypertension, diabetes mellitus, hyperlipidemia, stoke, ischemic heart disease histories, nutritional intake (total calories, protein, fat, and carbohydrate intake), and coffee consumption.

**Table S14.** Crude and adjusted odd ratios (95% confidence interval) of physical exercise for breast cancer histories

| Type of cancer      | OR (95% CI) for breast cancer |         |                  |         |
|---------------------|-------------------------------|---------|------------------|---------|
|                     | Crude                         | P-value | Adjusted†        | P-value |
| Age < 53 years old  |                               |         |                  |         |
| No regular exercise | 1.00                          |         | 1.00             |         |
| < 150 min/week      | 1.06 (0.82-1.37)              | 0.637   | 1.12 (0.87-1.45) | 0.377   |
| ≥ 150 min/week      | 1.48 (1.23-1.78)              | <.0001  | 1.38 (1.15-1.67) | 0.001*  |
| Age ≥ 53 years old  |                               |         |                  |         |
| No regular exercise | 1.00                          |         | 1.00             |         |
| < 150 min/week      | 1.21 (0.94-1.57)              | 0.146   | 1.26 (0.97-1.64) | 0.078   |
| ≥ 150 min/week      | 1.51 (1.26-1.79)              | <0.001* | 1.63 (1.36-1.94) | <0.001* |
| Male                |                               |         |                  |         |
| No regular exercise | 1.00                          |         | 1.00             |         |
| < 150 min/week      | N/A                           |         | N/A              |         |
| ≥ 150 min/week      | N/A                           |         | N/A              |         |
| Female              |                               |         |                  |         |
| No regular exercise | 1.00                          |         | 1.00             |         |
| < 150 min/week      | 1.26 (1.05-1.51)              | 0.013*  | 1.21 (1.01-1.45) | 0.043*  |
| ≥ 150 min/week      | 1.61 (1.42-1.83)              | <0.001* | 1.53 (1.35-1.74) | <0.001* |

\* Logistic regression model, Significance at  $P < 0.05$

† The model was adjusted for age, sex, income group, BMI, smoking, alcohol consumption, hypertension, diabetes mellitus, hyperlipidemia, stoke, ischemic heart disease histories, nutritional intake (total calories, protein, fat, and carbohydrate intake), and coffee consumption.

**Table S15.** Crude and adjusted odd ratios (95% confidence interval) of physical exercise for uterine cervix cancer histories

| Type of cancer      | OR (95% CI) for uterine cervix cancer |         |                  |         |
|---------------------|---------------------------------------|---------|------------------|---------|
|                     | Crude                                 | P-value | Adjusted†        | P-value |
| Age < 53 years old  |                                       |         |                  |         |
| No regular exercise | 1.00                                  |         | 1.00             |         |
| < 150 min/week      | 0.95 (0.67-1.34)                      | 0.775   | 1.07 (0.76-1.51) | 0.706   |
| ≥ 150 min/week      | 1.08 (0.83-1.40)                      | 0.579   | 1.07 (0.82-1.39) | 0.624   |
| Age ≥ 53 years old  |                                       |         |                  |         |
| No regular exercise | 1.00                                  |         | 1.00             |         |
| < 150 min/week      | 0.92 (0.68-1.25)                      | 0.598   | 1.05 (0.77-1.42) | 0.772   |
| ≥ 150 min/week      | 0.90 (0.73-1.11)                      | 0.306   | 1.05 (0.85-1.30) | 0.659   |
| Male                |                                       |         |                  |         |
| No regular exercise | 1.00                                  |         | 1.00             |         |
| < 150 min/week      | N/A                                   |         | N/A              |         |
| ≥ 150 min/week      | N/A                                   |         | N/A              |         |
| Female              |                                       |         |                  |         |
| No regular exercise | 1.00                                  |         | 1.00             |         |
| < 150 min/week      | 1.02 (0.81-1.28)                      | 0.870   | 1.06 (0.84-1.33) | 0.637   |
| ≥ 150 min/week      | 1.06 (0.90-1.25)                      | 0.500   | 1.06 (0.90-1.25) | 0.497   |

\* Logistic regression model, Significance at  $P < 0.05$

† The model was adjusted for age, sex, income group, BMI, smoking, alcohol consumption, hypertension, diabetes mellitus, hyperlipidemia, stoke, ischemic heart disease histories, nutritional intake (total calories, protein, fat, and carbohydrate intake), and coffee consumption.



**Table S16.** Crude and adjusted odd ratios (95% confidence interval) of physical exercise for lung cancer histories

| Type of cancer      | OR (95% CI) for lung cancer |         |                  |         |
|---------------------|-----------------------------|---------|------------------|---------|
|                     | Crude                       | P-value | Adjusted†        | P-value |
| Age < 53 years old  |                             |         |                  |         |
| No regular exercise | 1.00                        |         | 1.00             |         |
| < 150 min/week      | 2.25 (0.86-5.92)            | 0.100   | 2.23 (0.84-5.93) | 0.108   |
| ≥ 150 min/week      | 1.15 (0.44-3.02)            | 0.776   | 0.99 (0.37-2.64) | 0.986   |
| Age ≥ 53 years old  |                             |         |                  |         |
| No regular exercise | 1.00                        |         | 1.00             |         |
| < 150 min/week      | 0.88 (0.52-1.49)            | 0.634   | 0.89 (0.52-1.52) | 0.679   |
| ≥ 150 min/week      | 1.28 (0.93-1.78)            | 0.136   | 1.14 (0.82-1.60) | 0.430   |
| Male                |                             |         |                  |         |
| No regular exercise | 1.00                        |         | 1.00             |         |
| < 150 min/week      | 0.65 (0.34-1.26)            | 0.205   | 0.81 (0.42-1.58) | 0.541   |
| ≥ 150 min/week      | 1.18 (0.79-1.78)            | 0.419   | 0.97 (0.63-1.47) | 0.873   |
| Female              |                             |         |                  |         |
| No regular exercise | 1.00                        |         | 1.00             |         |
| < 150 min/week      | 1.43 (0.76-2.70)            | 0.271   | 1.47 (0.77-2.79) | 0.240   |
| ≥ 150 min/week      | 1.52 (0.95-2.44)            | 0.082   | 1.41 (0.87-2.26) | 0.163   |

\* Logistic regression model, Significance at  $P < 0.05$

† The model was adjusted for age, sex, income group, BMI, smoking, alcohol consumption, hypertension, diabetes mellitus, hyperlipidemia, stoke, ischemic heart disease histories, nutritional intake (total calories, protein, fat, and carbohydrate intake), and coffee consumption.

**Table S17.** Crude and adjusted odd ratios (95% confidence interval) of physical exercise for thyroid cancer histories

| Type of cancer      | OR (95% CI) for thyroid cancer |         |                  |         |
|---------------------|--------------------------------|---------|------------------|---------|
|                     | Crude                          | P-value | Adjusted†        | P-value |
| Age < 53 years old  |                                |         |                  |         |
| No regular exercise | 1.00                           |         | 1.00             |         |
| < 150 min/week      | 1.06 (0.85-1.31)               | 0.617   | 1.11 (0.90-1.38) | 0.334   |
| ≥ 150 min/week      | 1.44 (1.23-1.69)               | <0.001* | 1.36 (1.16-1.60) | <0.001* |
| Age ≥ 53 years old  |                                |         |                  |         |
| No regular exercise | 1.00                           |         | 1.00             |         |
| < 150 min/week      | 1.09 (0.85-1.40)               | 0.511   | 1.05 (0.82-1.35) | 0.693   |
| ≥ 150 min/week      | 1.44 (1.23-1.70)               | <0.001* | 1.43 (1.21-1.69) | <0.001* |
| Male                |                                |         |                  |         |
| No regular exercise | 1.00                           |         | 1.00             |         |
| < 150 min/week      | 1.05 (0.61-1.80)               | 0.860   | 0.91 (0.53-1.58) | 0.746   |
| ≥ 150 min/week      | 1.39 (0.94-2.05)               | 0.095   | 1.10 (0.74-1.64) | 0.625   |
| Female              |                                |         |                  |         |
| No regular exercise | 1.00                           |         | 1.00             |         |
| < 150 min/week      | 1.18 (0.99-1.40)               | 0.063   | 1.12 (0.94-1.33) | 0.197   |
| ≥ 150 min/week      | 1.52 (1.35-1.71)               | <0.001* | 1.45 (1.29-1.64) | <0.001* |

\* Logistic regression model, Significance at  $P < 0.05$

† The model was adjusted for age, sex, income group, BMI, smoking, alcohol consumption, hypertension, diabetes mellitus, hyperlipidemia, stoke, ischemic heart disease histories, nutritional intake (total calories, protein, fat, and carbohydrate intake), and coffee consumption.

**Table S18.** Crude and adjusted odd ratios (95% confidence interval) of physical exercise for prostate cancer histories

| Type of cancer      | OR (95% CI) for prostate cancer |         |                  |         |
|---------------------|---------------------------------|---------|------------------|---------|
|                     | Crude                           | P-value | Adjusted†        | P-value |
| Age < 53 years old  |                                 |         |                  |         |
| No regular exercise | 1.00                            |         | 1.00             |         |
| < 150 min/week      | N/A                             |         | N/A              |         |
| ≥ 150 min/week      | N/A                             |         | N/A              |         |
| Age ≥ 53 years old  |                                 |         |                  |         |
| No regular exercise | 1.00                            |         | 1.00             |         |
| < 150 min/week      | 1.70 (1.04-2.79)                | 0.034*  | 1.57 (0.95-2.58) | 0.077   |
| ≥ 150 min/week      | 2.30 (1.63-3.24)                | <0.001* | 1.64 (1.16-2.34) | 0.006*  |
| Male                |                                 |         |                  |         |
| No regular exercise | 1.00                            |         | 1.00             |         |
| < 150 min/week      | 1.29 (0.80-2.10)                | 0.294   | 1.56 (0.96-2.55) | 0.075   |
| ≥ 150 min/week      | 2.15 (1.53-3.02)                | <0.001* | 1.61 (1.13-2.28) | 0.008*  |
| Female              |                                 |         |                  |         |
| No regular exercise | 1.00                            |         | 1.00             |         |
| < 150 min/week      | N/A                             |         | N/A              |         |
| ≥ 150 min/week      | N/A                             |         | N/A              |         |

\* Logistic regression model, Significance at  $P < 0.05$

† The model was adjusted for age, sex, income group, BMI, smoking, alcohol consumption, hypertension, diabetes mellitus, hyperlipidemia, stoke, ischemic heart disease histories, nutritional intake (total calories, protein, fat, and carbohydrate intake), and coffee consumption.

**Table S19.** Crude and adjusted odd ratios (95% confidence interval) of physical exercise for bladder cancer histories

| Type of cancer      | OR (95% CI) for bladder cancer |         |                       |         |
|---------------------|--------------------------------|---------|-----------------------|---------|
|                     | Crude                          | P-value | Adjusted <sup>†</sup> | P-value |
| Age < 53 years old  |                                |         |                       |         |
| No regular exercise | 1.00                           |         | 1.00                  |         |
| < 150 min/week      | 2.41 (0.84-6.96)               | 0.103   | 2.06 (0.70-6.04)      | 0.189   |
| ≥ 150 min/week      | 1.23 (0.43-3.55)               | 0.698   | 1.10 (0.37-3.22)      | 0.868   |
| Age ≥ 53 years old  |                                |         |                       |         |
| No regular exercise | 1.00                           |         | 1.00                  |         |
| < 150 min/week      | 0.89 (0.43-1.85)               | 0.764   | 0.92 (0.44-1.91)      | 0.818   |
| ≥ 150 min/week      | 1.23 (0.78-1.94)               | 0.373   | 1.10 (0.69-1.75)      | 0.698   |
| Male                |                                |         |                       |         |
| No regular exercise | 1.00                           |         | 1.00                  |         |
| < 150 min/week      | 1.12 (0.56-2.26)               | 0.745   | 1.33 (0.66-2.69)      | 0.432   |
| ≥ 150 min/week      | 1.62 (0.99-2.66)               | 0.055   | 1.40 (0.84-2.33)      | 0.193   |
| Female              |                                |         |                       |         |
| No regular exercise | 1.00                           |         | 1.00                  |         |
| < 150 min/week      | 0.86 (0.29-2.53)               | 0.777   | 0.95 (0.32-2.84)      | 0.932   |
| ≥ 150 min/week      | 0.52 (0.21-1.31)               | 0.167   | 0.54 (0.21-1.37)      | 0.193   |

\* Logistic regression model, Significance at  $P < 0.05$

<sup>†</sup> The model was adjusted for age, sex, income group, BMI, smoking, alcohol consumption, hypertension, diabetes mellitus, hyperlipidemia, stoke, ischemic heart disease histories, nutritional intake (total calories, protein, fat, and carbohydrate intake), and coffee consumption.

**Table S20.** Crude and adjusted odd ratios (95% confidence interval) of physical exercise for thyroid cancer histories

| Type of cancer      | OR (95% CI) for thyroid cancer |         |                       |         |
|---------------------|--------------------------------|---------|-----------------------|---------|
|                     | Crude                          | P-value | Adjusted <sup>†</sup> | P-value |
| Age < 53 years old  |                                |         |                       |         |
| No regular exercise | 1.00                           |         | 1.00                  |         |
| < 150 min/week      | 1.06 (0.85-1.31)               | 0.617   | 1.11 (0.90-1.38)      | 0.334   |
| ≥ 150 min/week      | 1.44 (1.23-1.69)               | <0.001* | 1.36 (1.16-1.60)      | <0.001* |
| Age ≥ 53 years old  |                                |         |                       |         |
| No regular exercise | 1.00                           |         | 1.00                  |         |
| < 150 min/week      | 1.09 (0.85-1.40)               | 0.511   | 1.05 (0.82-1.35)      | 0.693   |
| ≥ 150 min/week      | 1.44 (1.23-1.70)               | <0.001* | 1.43 (1.21-1.69)      | <0.001* |
| Male                |                                |         |                       |         |
| No regular exercise | 1.00                           |         | 1.00                  |         |
| < 150 min/week      | 1.05 (0.61-1.80)               | 0.860   | 0.91 (0.53-1.58)      | 0.746   |
| ≥ 150 min/week      | 1.39 (0.94-2.05)               | 0.095   | 1.10 (0.74-1.64)      | 0.625   |
| Female              |                                |         |                       |         |
| No regular exercise | 1.00                           |         | 1.00                  |         |
| < 150 min/week      | 1.18 (0.99-1.40)               | 0.063   | 1.12 (0.94-1.33)      | 0.197   |
| ≥ 150 min/week      | 1.52 (1.35-1.71)               | <0.001* | 1.45 (1.29-1.64)      | <0.001* |

\* Logistic regression model, Significance at  $P < 0.05$

<sup>†</sup> The model was adjusted for age, sex, income group, BMI, smoking, alcohol consumption, hypertension, diabetes mellitus, hyperlipidemia, stroke, ischemic heart disease histories, nutritional intake (total calories, protein, fat, and carbohydrate intake), and coffee consumption.

**Table S21.** The interaction between coffee consumption, and physical exercise for various cancer histories.

| Type of cancer          | OR (95% CI) of Interaction |                  |
|-------------------------|----------------------------|------------------|
|                         | Crude                      | Adjusted†        |
| Gastric cancer          | 1.02 (0.99-1.05)           | 1.02 (0.99-1.06) |
| Hepatic cancer          | 0.94 (0.86-1.03)           | 0.93 (0.85-1.02) |
| Colon cancer            | 1.03 (0.99-1.08)           | 1.02 (0.98-1.07) |
| Breast cancer ‡         | 1.00 (0.97-1.03)           | 1.02 (0.98-1.05) |
| Uterine cervix cancer ‡ | 1.00 (0.96-1.04)           | 1.02 (0.98-1.06) |
| Lung cancer             | 1.01 (0.94-1.09)           | 0.99 (0.92-1.07) |
| Thyroid cancer          | 1.02 (1.00-1.05)           | 1.04 (1.02-1.07) |
| Prostate cancer ‡       | 1.08 (1.01-1.16)           | 1.06 (0.99-1.14) |
| Bladder cancer          | 1.10 (1.00-1.21)           | 1.07 (0.97-1.17) |

\* Logistic regression model, Significance at  $P < 0.05$

† The model was adjusted for age, sex, income group, BMI, smoking, alcohol consumption, hypertension, diabetes mellitus, hyperlipidemia, stroke, ischemic heart disease histories, and nutritional intake (total calories, protein, fat, and carbohydrate intake)

‡ Breast and uterine cervix cancer was calculated in Female, and prostate cancer was in Male.

**Table S22.** The association between physical exercise and thyroid cancer in the subgroup analyses by coffee consumption

| Subgroup by coffee consumption | OR (95% CI) of physical exercise for thyroid cancer |         |                  |         |
|--------------------------------|-----------------------------------------------------|---------|------------------|---------|
|                                | Crude                                               | P-value | Adjusted†        | P-value |
| No drink (n = 27,131)          |                                                     |         |                  |         |
| No regular exercise            | 1.00                                                |         | 1.00             |         |
| < 150 min/week                 | 1.10 (0.77-1.57)                                    | 0.591   | 1.09 (0.76-1.56) | 0.641   |
| ≥ 150 min/week                 | 1.32 (1.04-1.69)                                    | 0.025*  | 1.31 (1.03-1.68) | 0.031*  |
| 1-30 cups/month (n = 36,235)   |                                                     |         |                  |         |
| No regular exercise            | 1.00                                                |         | 1.00             |         |
| < 150 min/week                 | 1.10 (0.82-1.49)                                    | 0.518   | 1.15 (0.85-1.56) | 0.361   |
| ≥ 150 min/week                 | 1.29 (1.03-1.61)                                    | 0.029*  | 1.31 (1.04-1.65) | 0.021*  |
| 30-60 cups/month (n = 62,806)  |                                                     |         |                  |         |
| No regular exercise            | 1.00                                                |         | 1.00             |         |
| < 150 min/week                 | 0.89 (0.67-1.19)                                    | 0.442   | 0.93 (0.69-1.24) | 0.616   |
| ≥ 150 min/week                 | 1.54 (1.28-1.84)                                    | <0.001* | 1.58 (1.32-1.90) | <0.001* |
| > 60 cups/month (n = 36,048)   |                                                     |         |                  |         |
| No regular exercise            | 1.00                                                |         | 1.00             |         |
| < 150 min/week                 | 1.30 (0.88-1.92)                                    | 0.182   | 1.40 (0.95-2.07) | 0.090   |
| ≥ 150 min/week                 | 1.36 (1.01-1.82)                                    | 0.042*  | 1.35 (1.01-1.82) | 0.040*  |

\* Logistic regression model, Significance at  $P < 0.05$

† The model was adjusted for age, sex, income group, BMI, smoking, alcohol consumption, hypertension, diabetes mellitus, hyperlipidemia, stroke, ischemic heart disease histories, and nutritional intake (total calories, protein, fat, and carbohydrate intake)

**Table S23.** The association between coffee consumption and thyroid cancer in the subgroup analyses by physical exercise

| Subgroup by physical exercise    | OR (95% CI) of coffee consumption for thyroid cancer |         |                  |         |
|----------------------------------|------------------------------------------------------|---------|------------------|---------|
|                                  | Crude                                                | P-value | Adjusted†        | P-value |
| No regular exercise (n = 82,095) |                                                      |         |                  |         |
| No drink                         | 1.00                                                 |         | 1.00             |         |
| 1-30 cups/month                  | 0.91 (0.72-1.15)                                     | 0.043   | 0.93 (0.73-1.17) | 0.542   |
| 30-60 cups/month                 | 0.73 (0.58-0.90)                                     | 0.003*  | 0.72 (0.58-0.91) | 0.005*  |
| > 60 cups/month                  | 0.54 (0.42-0.69)                                     | <0.001* | 0.66 (0.50-0.87) | 0.003*  |
| < 150 min/week (n = 23,667)      |                                                      |         |                  |         |
| No drink                         | 1.00                                                 |         | 1.00             |         |
| 1-30 cups/month                  | 0.91 (0.61-1.36)                                     | 0.652   | 0.94 (0.63-1.42) | 0.773   |
| 30-60 cups/month                 | 0.59 (0.39-0.88)                                     | 0.010*  | 0.62 (0.41-0.94) | 0.025*  |
| > 60 cups/month                  | 0.63 (0.40-1.00)                                     | 0.051   | 0.87 (0.54-1.42) | 0.576   |
| ≥ 150 min/week (n = 56,458)      |                                                      |         |                  |         |
| No drink                         | 1.00                                                 |         | 1.00             |         |
| 1-30 cups/month                  | 0.89 (0.70-1.12)                                     | 0.320   | 0.90 (0.71-1.15) | 0.410   |
| 30-60 cups/month                 | 0.84 (0.68-1.04)                                     | 0.117   | 0.87 (0.70-1.09) | 0.233   |
| > 60 cups/month                  | 0.55 (0.42-0.73)                                     | <0.001* | 0.71 (0.53-0.95) | 0.023*  |

\* Logistic regression model, Significance at  $P < 0.05$

† The model was adjusted for age, sex, income group, BMI, smoking, alcohol consumption, hypertension, diabetes mellitus, hyperlipidemia, stroke, ischemic heart disease histories, and nutritional intake (total calories, protein, fat, and carbohydrate intake)
